# Supplementary material for: Uniform anatase single-crystal cubes with high thermal stability fully enclosed by active {010} and {001} facets
Source: Royal Society of Chemistry journal article supplement (doi:10.1039/c4ra16631k), 2015-01-01
Supplement: c4ra16631k1.pdf [file c4ra16631k1.pdf]

## **Uniform Anatase Single-Crystal Cubes with Highly Thermal Stability and Fully Enclosed by Active {010} and {001} Facets**

Meicheng Wen,<sup>a, b, †</sup> Peijue Liu,<sup>a, †</sup> Shuning Xiao,<sup>a</sup> Kohsuke Mori,<sup>b, c</sup> Yasutaka Kuwahara,<sup>b, c</sup> Hiromi Yamashita,<sup>b, c, \*</sup> Hexing Li<sup>a</sup> and Dieqing Zhang<sup>a, \*</sup>

a The Education Ministry Key Lab of Resource Chemistry and Shanghai Key Laboratory of Rare Earth Functional Materials, Shanghai Normal University, Shanghai, 200234, China.

b Division of Materials and Manufacturing Science, Graduate School of Engineering, Osaka University, 2-1 Yamadaoka, Suita, Osaka 565-0871, Japan.

c Unit of Elements Strategy Initiative for Catalysts & Batteries Kyoto University, ESICB, Kyoto University, Japan.

\*Corresponding author: dqzhang@shnu.edu.cn; (FAX) 86-21-6432-2272; Yamashita@mat.eng.osaka-u.ac.jp;

(FAX) 06-6879-7457

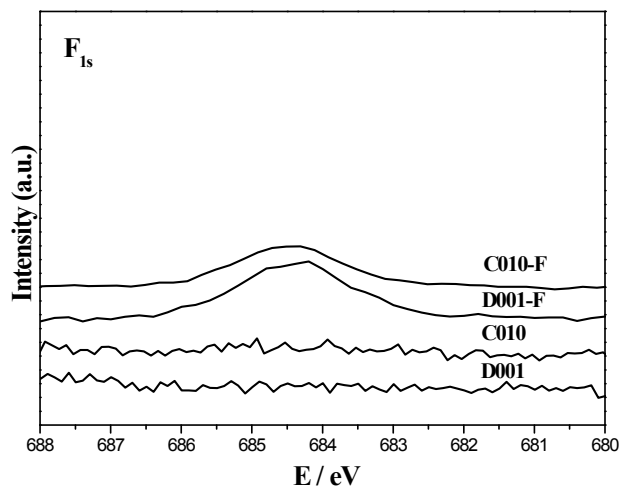

**Figure S1.** F<sub>1s</sub> XPS spectra of samples before and after calcination.

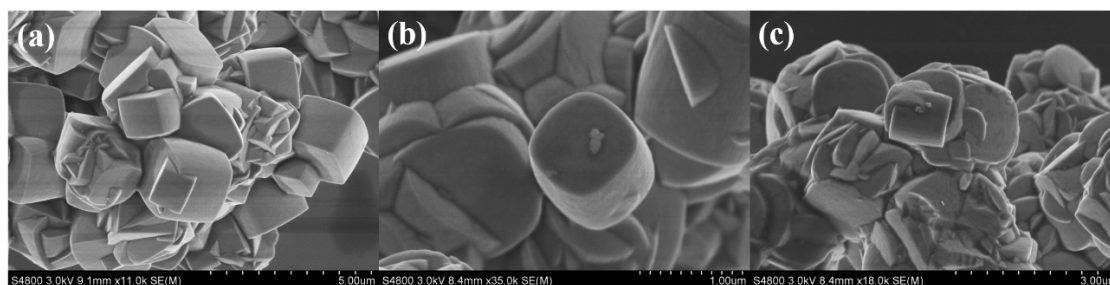

**Figure S2.** FE-SEM images of anatase TiO<sub>2</sub> crystals obtained in the absence of surfactant (a), in the presence of SDS (b), and CTAB (c), respectively.

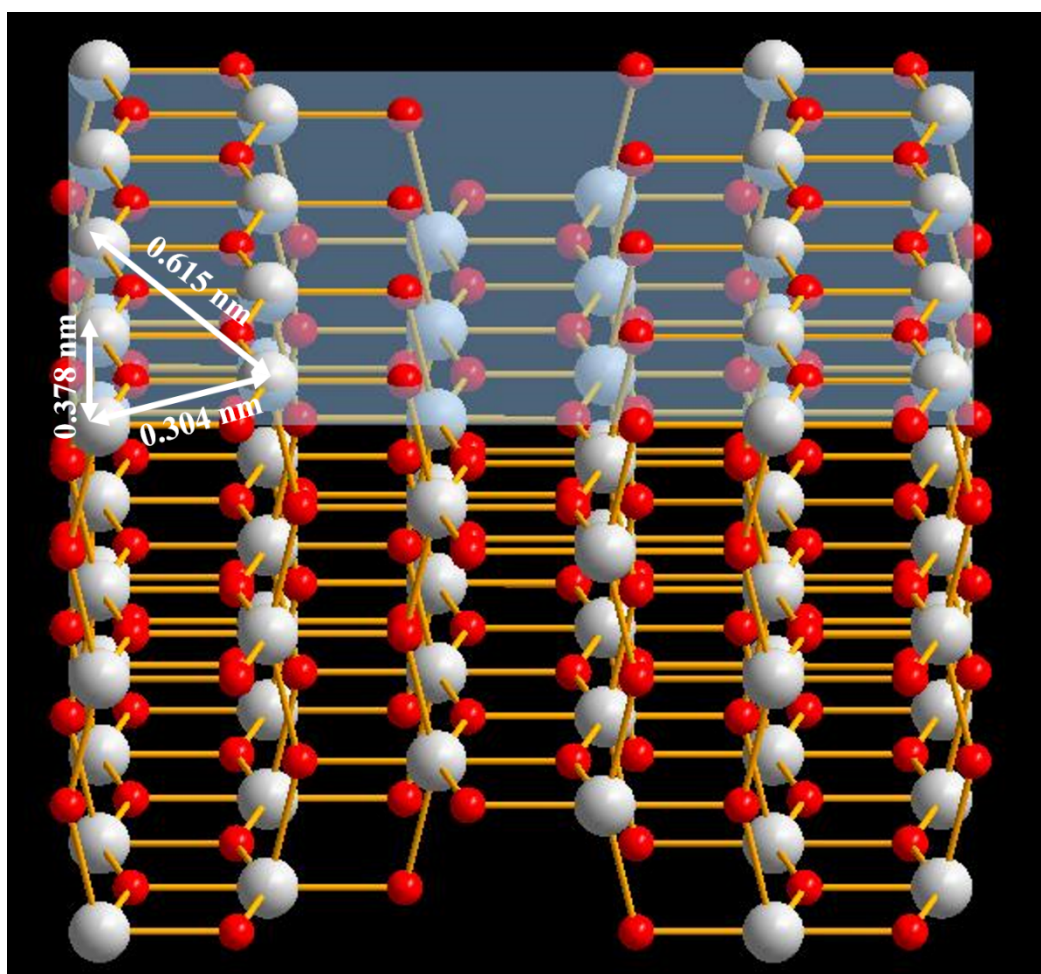

**Figure S3.** Distances between Ti atoms on the {010} surfaces of anatase.

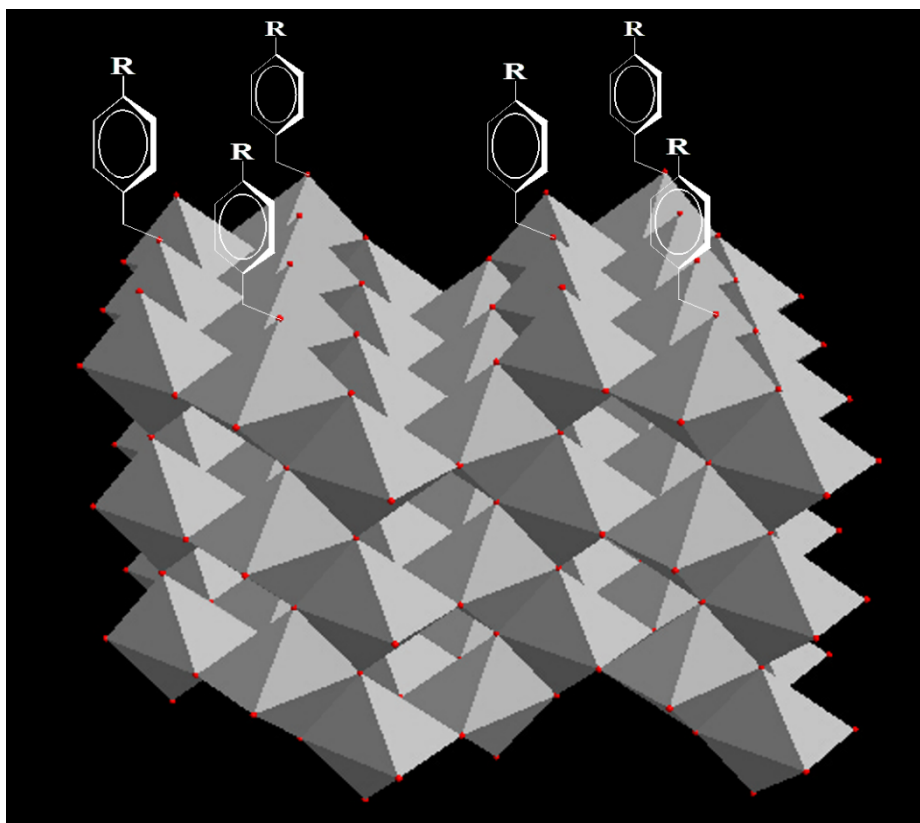

**Figure S4.** Schematic representation of the SDBS adsorbed on {010} facets of anatase TiO<sub>2</sub> through  $\pi$ - $\pi$  stacking between aromatic rings.

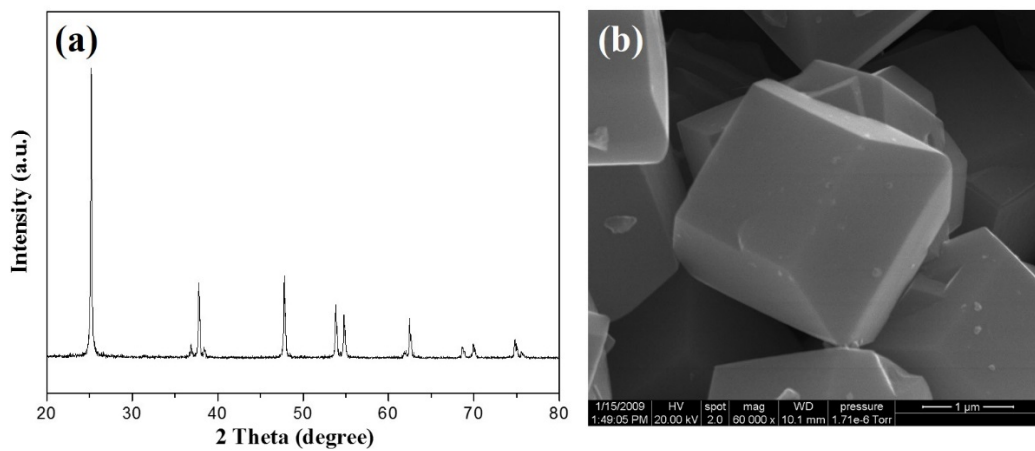

**Figure S5.** (a) XRD pattern and (b) FESEM images of samples D001-F prepared by a method previously published by our group.<sup>[1]</sup>

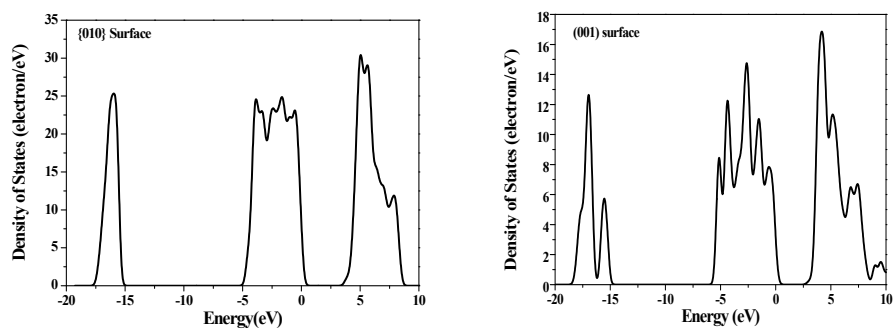

**Figure S6.** Partial density of states (PDOS) of {010} and {001} surface of anatase TiO<sub>2</sub>.

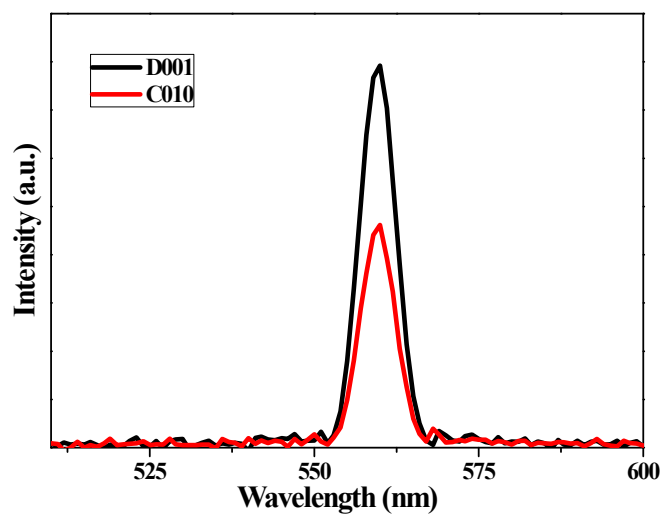

**Figure S7.** The photoluminescence spectroscopy spectra of the sample C010 and D001

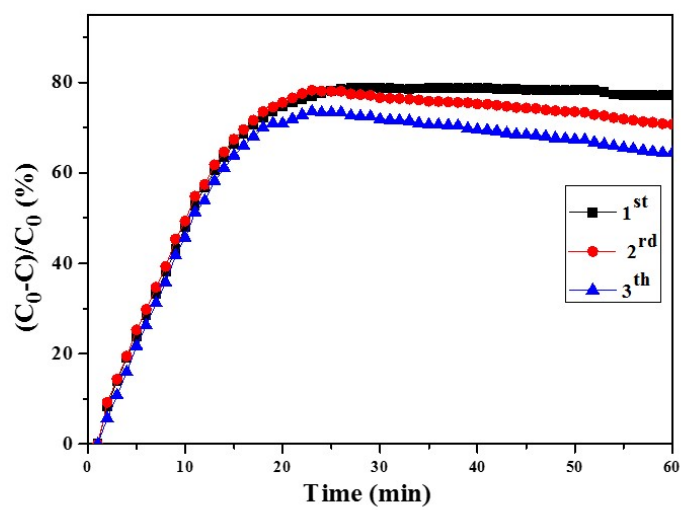

**Figure S8.** The recyclability of the photocatalytic oxidation of NO over C010

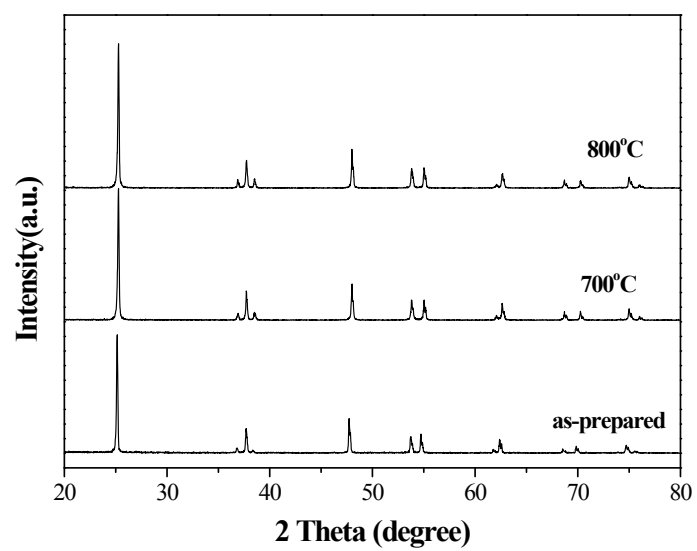

**Figure S9.** Wide-angle XRD patterns of the TiO<sub>2</sub> single-crystal cubes calcined at different temperatures under air atmosphere for 1h.

References:

- 1 D. Zhang, G. Li, H. Wang, K. M. Chan and J. C. Yu, *Crys. Growth Des.* 2010, 10, 1130-1137.
